# Supplementary material for: Up-regulation of cryptochrome 1 gene expression in cotton bollworm (Helicoverpa armigera) during migration over the Bohai Sea
Source: PeerJ. 2019 Nov 15;7:e8071. doi: 10.7717/peerj.8071 (PMC6859876; doi:10.7717/peerj.8071)
Supplement: Supplemental Information 6 [file peerj-07-8071-s006.xlsx]

## Sheet: Sheet1
Ct values used in Figure 3
Figure 3A, 3B
Night	antenna	antenna	antenna	head	head	head	head	head	throax	throax	throax	throax	throax	abdomen	abdomen	abdomen	abdomen	abdomen	leg	leg	leg	leg
actin	24.7956	26.2423	29.3886	32.9246	25.5482	25.6789	20.3124	23.213	22.1874	23.1592	19.5969	19.0746	26.5943	15.4564	15.7148	14.057	18.3621	25.4757	18.4419	20.8171	20.4885	23.3799
CRY1	32.6083	32.8881	35.8963	35.4011	31.2299	32.3082	28.681	29.7854	30.6431	29.9323	26.8687	27.3898	26.5964	23.3213	21.0046	21.1435	26.6131	26.254	26.7274	28.7692	28.7985	31.247
CRY2	28.7125	30.1651	33.0966	34.6061	30.1643	32.2558	24.2084	28.8827	26.8183	26.4638	23.9862	24.5727	33.7938	32.8721	19.8329	17.3213	22.9283	33.1327	24.5795	25.6234	26.9016	27.006
Day	antenna	antenna	antenna	antenna	antenna	head	head	head	head	head	throax	throax	throax	throax	throax	abdomen	abdomen	abdomen	abdomen	leg	leg	leg	leg
actin	30.6843	23.0369	25.9368	26.855	22.7487	26.8616	23.9351	24.7899	26.4379	32.0387	21.5397	21.9197	19.7254	18.3548	20.1329	14.6071	15.9464	18.2853	14.6729	18.3237	20.2945	20.4272	18.1798
CRY1	31.74	29.0011	31.9982	32.9939	29.253	31.1125	30.1387	32.64	32.9156	34.9993	26.8131	27.6632	25.2567	25.7219	27.0527	25.9634	23.3347	24.7861	23.3955	24.7115	29.9218	27.35	25.0504
CRY2	31.9383	29.488	30.4454	30.7166	27.8961	32.2288	31.614	31.0718	29.9553	33.176	24.2649	25.9018	23.9652	28.9842	23.6314	19.6812	20.4038	22.8886	33.3236	25.323	25.9773	24.8304	23.4199
Figure 3C, 3D
Female	1st	1st	1st	1st	3rd	3rd	3rd	3rd	5th	5th	5th	5th	7th	7th	7th	7th
actin	17.8079	16.9873	17.0198	17.0424	18.2188	19.5098	16.8873	20.9944	17.9005	17.6306	17.7398	17.8786	16.1095	21.4603	20.4936	18.9126
CRY1	24.6083	23.824	22.9717	23.4884	25.6998	28.6654	23.9063	25.1969	25.6681	24.0173	23.9491	25.3439	23.8519	30.5123	29.7175	27.2387
CRY2	34.7658	34.6211	34.7629	34.4737	34.3373	34.8357	35.2382	34.6	34.4778	34.4253	34.4812	35.41	34.8721	35.8616	36.337
Male	1st	1st	1st	1st	3rd	3rd	3rd	3rd	5th	5th	5th	5th	7th	7th	7th	7th
actin	18.7157	17.316	18.1745	18.5524	20.8614	19.3988	20.598	21.1408	21.807	20.9553	22.1806	18.5921	20.8097	20.3686	20.5347	20.9502
CRY1	24.9666	23.5249	23.6115	25.0721	24.4141	23.6207	25.5302	25.666	27.2657	25.8419	27.0039	26.7188	24.5548	25.9353	24.394	23.3435
CRY2	35.1271	35.04	34.2617	34.2095	35.0388	34.3624	35.1266	35.0147	33.9111	34.8089	34.2396		32.3758	37.1309	36.7236	36.734
Figure 3E, 3F
	CD-F3	CD-F3	CD-F3	CD-F3	CD	CD	CD	CD	XXF1	XXF1	XXF1	XXF1	XXF1	XXF1	XXF1	XXF1	96s	96s	96s	96s	96s	96s	96s	96s	LF	LF	LF	LF	1463	1463	1463	1463	1463	1463	1463	1463
actin	18.5995	19.4611	24.0235	19.8788	24.9473	24.3485	24.827	23.2463	17.7481	21.4374	16.3285	14.7662	21.0842	16.6174	16.3118	17.8008	18.2188	19.5098	16.8873	20.9944	20.8614	19.3988	20.598	21.1408	17.0674	18.1099	19.3477	16.3445	27.8695	25.2534	26.9089	26.5154	23.9	24.9526	24.7628	24.8907
CRY1	27.8235	27.7881	30.8442	30.8552	27.6307	24.0919	27.8962	23.9889	24.9856	24.025	22.4475	25.8365	25.5678	26.459	23.7393	25.9462	25.6998	28.6654	23.9063	25.1969	24.4141	23.6207	25.5302	25.666	26.5141	26.2261	27.0713	26.3403	31.9531	29.7316	33.5491	34.0444	32.3656	30.8486	29.2472	30.3171
CRY2	35.6377	21.941	20.3078	22.3527	28.1436	35.3119	36.8109	24.2381	36.1593	34.2928	36.3766		36.3011		35.2927		34.3373	34.8357	35.2382	34.6	35.0388	34.3624	35.1266	35.0147	20.6076	23.0657	35.9853	35.4542	34.8868	34.1367	34.6756	35.1089	37.0426	38.489	38.6301	37.7198
Figure 3G, 3H
	Jun	Jun	Jun	Jun	Jun	Jun	Jul	Jul	Jul	Jul	Jul	Jul	Aug	Aug	Aug	Aug	Aug	Aug	Sep	Sep	Sep	Sep	Sep	Sep	Oct	Oct	Oct	Oct	Oct	Oct
actin	26.2409	26.0189	23.667	23.8732	20.8232	24.3793	31.0233	30.7357	29.9551	29.3609	28.4755	31.9883	22.6832	25.5537	23.4372	22.0865	23.7495	21.7463	23.5124	25.5994	24.1021	29.9725	31.6719	29.9929	20.5609	21.9977	18.8828	26.5898	22.5469	19.5893
CRY1	31.808	30.2384	28.5783	33.4108	30.0846	28.2457	32.8578	32.0762	30.987	31.3998	30.0219	31.5522	31.4824	30.0495	29.3266	28.3446	27.6663	26.5298	30.5872	33.5237	30.3001	33.0292	33.0198	31.4749	25.0268	24.7143	21.4222	27.0008	28.5763	24.72
CRY2	30.8788	36.6461	28.867	28.1576	38.2137	28.1294	32.5274	30.2583	31.3039	30.7329		30.6335	30.25	29.2559	24.8008	28.2712	28.2078	24.1875	30.9416	38.3143	27.9026	32.2981	32.3519		25.8493	27.1094	23.9763	29.4087	24.3549	20.9039
Ct values used in Figure 4
CT value at different time in individuals from LF population
	00:00:00	00:00:00	00:00:00	00:00:00		03:00:00	03:00:00	03:00:00	03:00:00		06:00:00	06:00:00	06:00:00	06:00:00		09:00:00	09:00:00	09:00:00	09:00:00		12:00:00	12:00:00	12:00:00	12:00:00		15:00:00	15:00:00	15:00:00	15:00:00		18:00:00	18:00:00	18:00:00	18:00:00		21:00:00	21:00:00	21:00:00	21:00:00
actin	20.4127	17.9455	20.1628	20.3688		20.0005	19.8182	19.183	19.3056		17.1976	16.6001	18.5697	17.5058		17.6198	16.3604	22.6295	20.2386		17.918	17.8061	18.5356	17.6194		18.5113	16.2334	19.9172	18.4197		17.0674	18.1099	19.3477	16.3445		19.6856	19.5551	17.9065	20.6469
CRY1	29.1022	26.3947	23.9819	23.3432		23.4446	28.8158	24.028	24.3411		27.5528	26.8696	22.2814	22.8765		24.0269	25.7929	29.8868	27.8947		27.7944	26.7787	19.9864	23.0001		22.69	26.4149	27.304	22.8976		26.5141	26.2261	27.0713	26.3403		25.4461	28.7574	22.5218	29.33
CRY2	36.9612	34.3358	35.6131	41.2014		38.5269	39.4567	25.6009	38.1004		35.8335	21.1621	35.4462	34.6465		37.0617	22.7744		26.1203		23.6639	23.0626	39.4978	23.4574		35.3935	21.4021	26.5594	24.6891		20.6076	23.0657	35.9853	35.4542			36.2788	35.696	36.7912
CT value at different time in individuals from CD population
	00:00:00	00:00:00	00:00:00	00:00:00		03:00:00	03:00:00	03:00:00	03:00:00		06:00:00	06:00:00	06:00:00	06:00:00		09:00:00	09:00:00	09:00:00	09:00:00		12:00:00	12:00:00	12:00:00	12:00:00		15:00:00	15:00:00	15:00:00	15:00:00		18:00:00	18:00:00	18:00:00	18:00:00		21:00:00	21:00:00	21:00:00	21:00:00
actin	25.174	29.2559	26.9199	25.593		24.818	20.2671	25.0083	25.0785		24.0983	27.3442	25.4126	27.0401		16.1106	19.4955	19.6522	20.3587		26.6116	24.3121	24.9193	26.6286		24.9473	24.3485	24.827	23.2463		24.6694	26.3414	25.2485	25.5691		22.7669	24.3643	25.8655	24.0009
CRY1	27.3162	30.0312	27.3629	28.8509		26.6991	28.4059	26.8935	26.2647		25.8988	31.7958	26.0375	30.4228		22.5872	25.1715	23.6351	25.0562		25.7392	25.0585	23.015	26.4424		27.6307	24.0919	27.8962	23.9889		26.1309	27.7882	27.4245	28.6614		25.8685	27.3722	26.9728	25.4434
CRY2	23.158	26.6999		36.4056		35.2252	23.1701	35.6455	22.7613		35.5159	29.6524	23.6304	27.6739		19.7259	25.3341		25.3078		26.9626	25.1725	24.1893	27.5345		28.1436	35.3119	36.8109	24.2381		24.2345	28.0334	24.6489	26.268		22.954	35.7905	26.3667	35.244
